# Supplementary material
Source: PubMed Central journal article supplement (PMC3051245)
Supplement: supp_tpc.110.082321_Supplemental_data.pdf [file supp_tpc.110.082321_Supplemental_data.pdf]

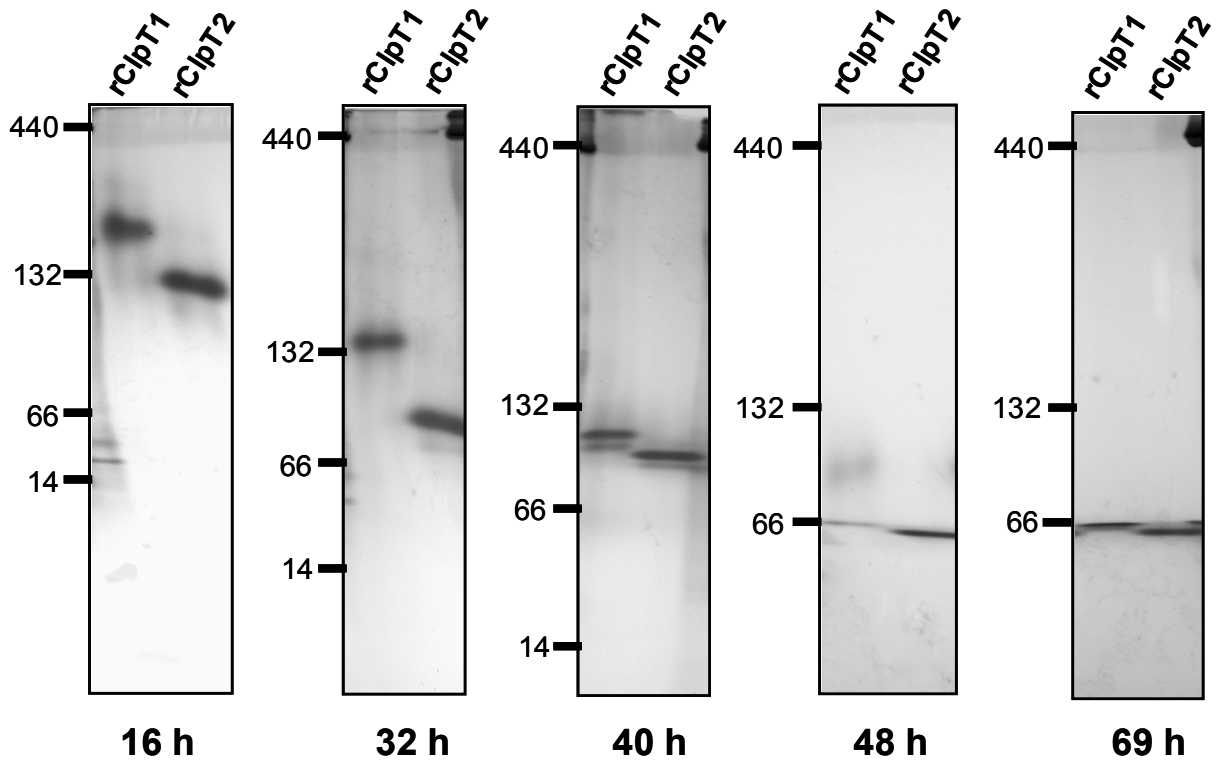

**Supplemental Figure 1. Size determination of rClpT1 and rClpT2 by native-PAGE.**

Both rClpT proteins (10  $\mu$ g each) were separated by native-PAGE on 7-23% polyacrylamide gradient Tris-borate gels. A series of gels were electrophoresed at a constant current of 8 mA at 4°C from 16 to 69 h. Also separated were native molecular mass markers as indicated on the left of each panel (lactalbumin, 14 kDa; BSA, 66 kDa monomer, 132 kDa dimer; ferritin, 440 kDa monomer) in order to correctly size the rClpT oligomers. The figure shows that both rClpT1 and rClpT2 reach their pore limitation within the gel matrix by 48 h of electrophoresis.

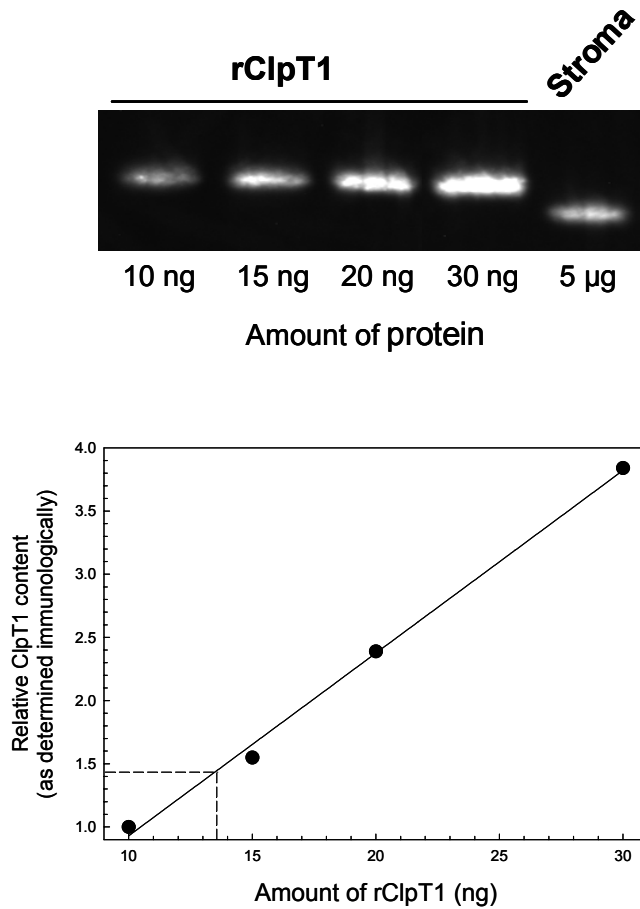

**Supplemental Figure 2. Relative amount of stromal ClpT1 in wild type Arabidopsis.**

Different amounts of recombinant ClpT1 protein (rClpT1) were separated by denaturing-PAGE along with a stromal protein extract from wild type Arabidopsis. ClpT1 was detected by immunoblotting using a specific polyclonal antibody. Shown is a representative replicate of three that were each quantified to prepare a calibration curve (shown below). In the calibration curve, the amounts of ClpT1 protein detected immunologically were normalized to that for 10 ng of rClpT1, which was set to 1. The relative amount of stromal ClpT1 was then determined (as shown by the dashed line) and averaged for the three replicates.
